# Supplementary material
Source: PubMed Central journal article supplement (PMC6703847)
Supplement: NIHMS998813-supplement-Supplementary_Information.pdf [file NIHMS998813-supplement-Supplementary_Information.pdf]

## Supporting information

### **Crosslinked Chitosan-PEG Hydrogel for Culture of Human Glioblastoma Cell Spheroids and Drug Screening**

*Fei-Chien Chang, Sheeny Lan Levengood, Nick Cho, Likai Chen, Everet Wang, John S. Yu, Miqin Zhang\**

\* Prof. Miqin Zhang  
Department of Materials Science and Engineering  
University of Washington  
Seattle, Washington 98195, USA  
E-mail: mzhang@u.washington.edu

#### **Cell morphology on the gels crosslinked with various concentrations of genipin**

U118-RFP human glioblastoma cells were cultured in DMEM with 10% FBS and 1% AA in humidified incubator with 5% CO<sub>2</sub> at 37°C. Genipin-crosslinked chitosan-PEG(CSPG) hydrogels was prepared with 0.063 to 1 mM genipin. Freshly-mixed CSPG solution was dispensed into 96-well plates at 100 µL per well and incubated at 37°C for 24 hrs. Cells were seeded at 5,000 cells per well and cultured for 5 days. Cells were imaged using a Nikon ECLIPSE TE2000-S microscope (**Figure S1**).

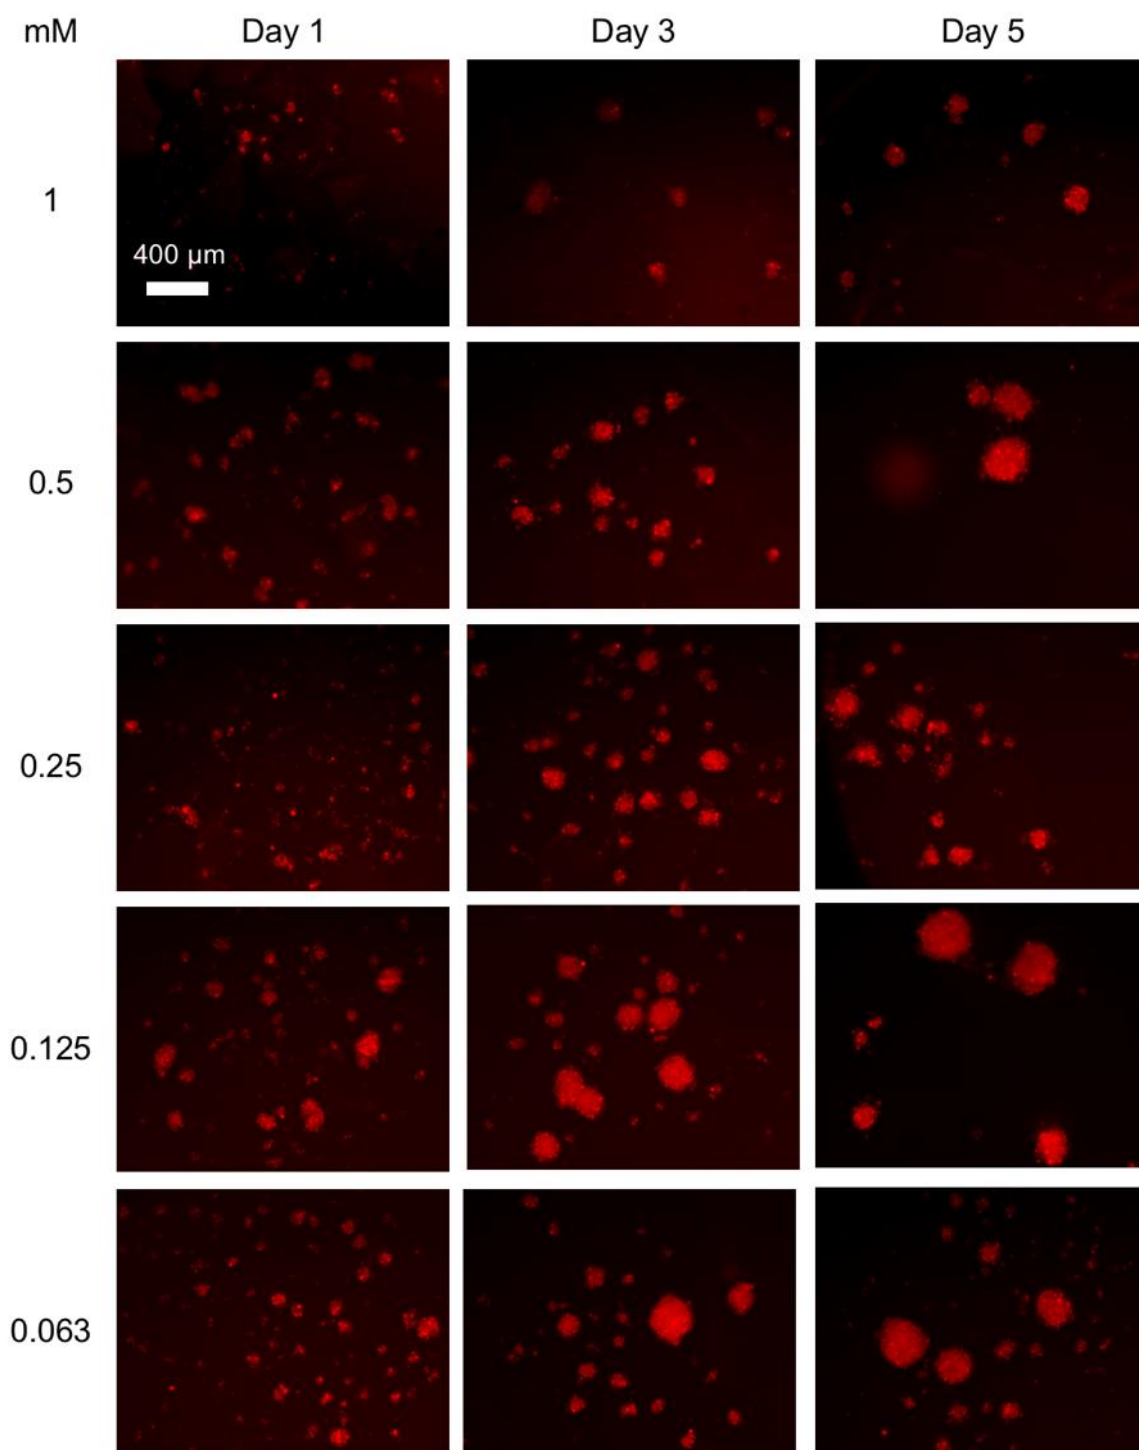

**Figure S1.** The morphology of U118-RFP cells cultured on genipin-crosslinked chitosan-PEG hydrogels crosslinked with various genipin concentrations in the gel at different time points after cell seeding.
